# Supplementary material
Source: publisher figshare collection journal article supplement (https://frontiersin.figshare.com/ndownloader/files/20773554)
Supplement: Supplementary file 1 [file 20773554]

**Supplementary Material**

**S1.** Primer sequences

58A2F Metagenome (5’ to 3’)- tcgtcggcagcgttcagatgtgtataagagacagatcgatgaagaacgcag

ITS4 Metagenome (5’to 3’)- gtctcgtgggctcggagatgttgtataagagacagtcctccgcttattgatatgc

**S2.** Genbank accession numbers for DNA sequences used in phylogeny estimation.

| Species | rbcL | matK |
| --- | --- | --- |
| *Quercus alba* | KF418899.1 | KJ840978.1 |
| *Quercus rubra* | AB125026.1 | AY312058.1 |
| *Quercus macrocarpa* | LM653016.1 | HQ593405.1 |
| *Quercus palustris* | KP088813.1 | AB125040 |
| *Carya ovata* | KJ841222.1 | KP210371.1 |
| *Carya cordiformis* | HQ590020.1 | KP210370.1 |
| *Fagus grandifolia* | AY263936.1 | KJ592949.1 |
| *Betula allegheniensis* | KF418936.1 | KJ592868.1 |
| *Betula lenta* | KF418939 | KP642954.1 |
| *Ulmus americana* | KC539676.1 | KJ593141.1 |
